# Supplementary material
Source: publisher site journal article supplement (https://www.dovepress.com/article/454116)
Supplement: Supplementary file 1 [file get_supplementary_file.php]

## Supplementary data 1

### Supplementary data Resource equation method

According to resource equation method:

$$DF = N - k = kn - k = k(n - 1)$$

The acceptable range of degrees of freedom (DF) for the error term in an analysis of variance (ANOVA) is between 10 to 20. Where N = total number of subjects, k = number of groups, and n = number of subjects per group.

By rearranging the formula, n is given as:

$$n = DF/k + 1$$

Based on the acceptable range of the DF, the DF in the formulas are replaced with the minimum (10) and maximum (20) DFs to obtain the minimum and maximum numbers of animals per group:

$$\text{Minimum } n = 10/k + 1$$

$$\text{Maximum } n = 20/k + 1$$

In this paper, the effects of ED-71 were compared between three groups (Sham, OVX, OVX+ED-71), the sample sizes per group are

$$\text{Minimum } n = 10/3 + 1 = 4.3 = \text{rounded up to 5 animals/group}$$

$$\text{Maximum } n = 20/3 + 1 = 7.7 = \text{rounded down to 7 animals/group.}$$

In conclusion, for the proposed study, between 5 and 7 animals per group are required. Our research used 5 rats (n=5) in each group, which is the sample size calculated according resource equation method.

## Supplementary data 2

Supplementary data Bootstrapping to Figure 3

|                    | Group                                | Mean      | <i>P</i> |
|--------------------|--------------------------------------|-----------|----------|
| Day0 EphrinB2 mRNA | Control                              | 1         | <0.001*  |
|                    | H <sub>2</sub> O <sub>2</sub>        | 0.6478633 |          |
|                    | H <sub>2</sub> O <sub>2</sub> +ED-71 | 0.7790294 | <0.001** |
| Day3 EphrinB2 mRNA | Control                              | 1         | <0.001*  |
|                    | H <sub>2</sub> O <sub>2</sub>        | 0.3239039 |          |
|                    | H <sub>2</sub> O <sub>2</sub> +ED-71 | 0.4840527 | <0.001** |
| Day5 EphrinB2 mRNA | Control                              | 1         | <0.001*  |
|                    | H <sub>2</sub> O <sub>2</sub>        | 0.5140316 |          |
|                    | H <sub>2</sub> O <sub>2</sub> +ED-71 | 0.7528643 | <0.001** |
| Day7 EphrinB2 mRNA | Control                              | 1         | <0.001*  |
|                    | H <sub>2</sub> O <sub>2</sub>        | 0.8299478 |          |
|                    | H <sub>2</sub> O <sub>2</sub> +ED-71 | 1.8367826 | <0.001** |
| Day0 EphB4 mRNA    | Control                              | 1         | <0.001*  |
|                    | H <sub>2</sub> O <sub>2</sub>        | 0.4094953 |          |
|                    | H <sub>2</sub> O <sub>2</sub> +ED-71 | 0.8668878 | <0.001** |
| Day3 EphB4 mRNA    | Control                              | 1         | <0.001*  |
|                    | H <sub>2</sub> O <sub>2</sub>        | 0.5654038 |          |
|                    | H <sub>2</sub> O <sub>2</sub> +ED-71 | 0.5276849 | <0.001** |
| Day5 EphB4 mRNA    | Control                              | 1         | <0.001*  |
|                    | H <sub>2</sub> O <sub>2</sub>        | 0.5377046 |          |
|                    | H <sub>2</sub> O <sub>2</sub> +ED-71 | 0.8028877 | <0.001** |
| Day7 EphB4 mRNA    | Control                              | 1         | <0.001*  |
|                    | H <sub>2</sub> O <sub>2</sub>        | 0.6358472 |          |
|                    | H <sub>2</sub> O <sub>2</sub> +ED-71 | 2.3071846 | <0.001** |
| Day0 OPG mRNA      | Control                              | 1         | <0.001*  |
|                    | H <sub>2</sub> O <sub>2</sub>        | 0.4123206 |          |
|                    | H <sub>2</sub> O <sub>2</sub> +ED-71 | 0.8643591 | <0.001** |
| Day3 OPG mRNA      | Control                              | 1         | <0.001*  |
|                    | H <sub>2</sub> O <sub>2</sub>        | 0.566477  |          |
|                    | H <sub>2</sub> O <sub>2</sub> +ED-71 | 0.527445  | <0.001** |
| Day5 OPG mRNA      | Control                              | 1         | <0.001*  |
|                    | H <sub>2</sub> O <sub>2</sub>        | 0.537207  |          |
|                    | H <sub>2</sub> O <sub>2</sub> +ED-71 | 0.8030707 | <0.001** |
| Day7 OPG mRNA      | Control                              | 1         | <0.001*  |
|                    | H <sub>2</sub> O <sub>2</sub>        | 0.6362562 |          |
|                    | H <sub>2</sub> O <sub>2</sub> +ED-71 | 2.3034438 | <0.001** |
| Day0 RANKL mRNA    | Control                              | 1         | <0.001*  |
|                    | H <sub>2</sub> O <sub>2</sub>        | 2.606546  |          |
|                    | H <sub>2</sub> O <sub>2</sub> +ED-71 | 1.115029  | <0.001** |

|                                 |                                      |           |          |
|---------------------------------|--------------------------------------|-----------|----------|
| Day3 RANKL mRNA                 | Control                              | 1         | <0.001*  |
|                                 | H <sub>2</sub> O <sub>2</sub>        | 6.098869  |          |
|                                 | H <sub>2</sub> O <sub>2</sub> +ED-71 | 1.948132  | <0.001** |
| Day5 RANKL mRNA                 | Control                              | 1         | <0.001*  |
|                                 | H <sub>2</sub> O <sub>2</sub>        | 2.976752  |          |
|                                 | H <sub>2</sub> O <sub>2</sub> +ED-71 | 0.7560299 | <0.001** |
| Day7 RANKL mRNA                 | Control                              | 1         | <0.001*  |
|                                 | H <sub>2</sub> O <sub>2</sub>        | 9.390473  |          |
|                                 | H <sub>2</sub> O <sub>2</sub> +ED-71 | 1.585961  | <0.001** |
| EphrinB2 protein                | Control                              | 0.9285611 | <0.001*  |
|                                 | H <sub>2</sub> O <sub>2</sub>        | 0.5291064 |          |
|                                 | H <sub>2</sub> O <sub>2</sub> +ED-71 | 0.9073277 | <0.001** |
| EphB4 protein                   | Control                              | 0.3503619 | <0.001*  |
|                                 | H <sub>2</sub> O <sub>2</sub>        | 0.174954  |          |
|                                 | H <sub>2</sub> O <sub>2</sub> +ED-71 | 0.3688031 | <0.001** |
| OPG protein                     | Control                              | 0.5401576 | <0.001*  |
|                                 | H <sub>2</sub> O <sub>2</sub>        | 0.3792765 |          |
|                                 | H <sub>2</sub> O <sub>2</sub> +ED-71 | 0.5984693 | <0.001** |
| RANKL protein                   | Control                              | 0.5105615 | <0.001*  |
|                                 | H <sub>2</sub> O <sub>2</sub>        | 0.9186226 |          |
|                                 | H <sub>2</sub> O <sub>2</sub> +ED-71 | 0.3506871 | <0.001** |
| EphrinB2 fluorescence intensity | Control                              | 1         | <0.001*  |
|                                 | H <sub>2</sub> O <sub>2</sub>        | 0.5840272 |          |
|                                 | H <sub>2</sub> O <sub>2</sub> +ED-71 | 1.2284489 | <0.001** |
| EphB4 fluorescence intensity    | Control                              | 1         | <0.001*  |
|                                 | H <sub>2</sub> O <sub>2</sub>        | 0.4186136 |          |
|                                 | H <sub>2</sub> O <sub>2</sub> +ED-71 | 1.1356910 | <0.001** |

\* Control vs. H<sub>2</sub>O<sub>2</sub>. \*\* H<sub>2</sub>O<sub>2</sub> vs. H<sub>2</sub>O<sub>2</sub>+ED-71

### Supplementary data 3

Supplementary data Bootstrapping to Figure 4

|                              | Group           | Mean      | <i>P</i>              |
|------------------------------|-----------------|-----------|-----------------------|
| EphB4 mRNA                   | NC              | 1         |                       |
|                              | ED-71+NC        | 1.607298  | <0.001 <sup>#</sup>   |
|                              | SiEphB4         | 0.5004788 | <0.001 <sup>##</sup>  |
|                              | ED-71 + SiEphB4 | 0.3346039 | <0.001 <sup>###</sup> |
| RANKL mRNA                   | NC              | 1         |                       |
|                              | ED-71+NC        | 0.2233437 | <0.001 <sup>#</sup>   |
|                              | SiEphB4         | 1.518018  | <0.001 <sup>##</sup>  |
|                              | ED-71 + SiEphB4 | 1.4468368 | <0.001 <sup>###</sup> |
| OPG mRNA                     | NC              | 1         |                       |
|                              | ED-71+NC        | 3.005825  | <0.001 <sup>#</sup>   |
|                              | SiEphB4         | 0.3000667 | <0.001 <sup>##</sup>  |
|                              | ED-71 + SiEphB4 | 0.9826686 | <0.001 <sup>###</sup> |
| OPG mRNA                     | NC              | 1         |                       |
|                              | ED-71+NC        | 3.005825  | <0.001 <sup>#</sup>   |
|                              | SiEphB4         | 0.3000667 | <0.001 <sup>##</sup>  |
|                              | ED-71 + SiEphB4 | 0.9826686 | <0.001 <sup>###</sup> |
| EphB4 fluorescence intensity | NC              | 1         |                       |
|                              | ED-71+NC        | 4.602377  | <0.001 <sup>#</sup>   |
|                              | SiEphB4         | 0.4421483 | <0.001 <sup>##</sup>  |
|                              | ED-71 + SiEphB4 | 0.6619803 | <0.001 <sup>###</sup> |
| EphB4 protein                | NC              | 0.2818483 |                       |
|                              | ED-71+NC        | 0.5567825 | <0.001 <sup>#</sup>   |
|                              | SiEphB4         | 0.1661123 | <0.001 <sup>##</sup>  |
|                              | ED-71 + SiEphB4 | 0.1832820 | <0.001 <sup>###</sup> |
| OPG protein                  | NC              | 0.4494232 |                       |
|                              | ED-71+NC        | 0.8202374 | <0.001 <sup>#</sup>   |
|                              | SiEphB4         | 0.3362976 | <0.001 <sup>##</sup>  |
|                              | ED-71 + SiEphB4 | 0.3482290 | <0.001 <sup>###</sup> |
| RANKL protein                | NC              | 0.3108056 |                       |
|                              | ED-71+NC        | 0.1487850 | <0.001 <sup>#</sup>   |
|                              | SiEphB4         | 0.7052066 | <0.001 <sup>##</sup>  |
|                              | ED-71 + SiEphB4 | 0.5531208 | <0.001 <sup>###</sup> |

<sup>#</sup> NC vs. ED-71+NC. <sup>##</sup> NC vs. SiEphB4. <sup>###</sup> ED-71+NC vs. ED-71 + SiEphB4

# Supplementary data 4

Supplementary data Bootstrapping to Figure 5

|              | Group                                | Mean      | <i>P</i>  |
|--------------|--------------------------------------|-----------|-----------|
| MMP9 mRNA    | Control                              | 1         | <0.001*   |
|              | H <sub>2</sub> O <sub>2</sub>        | 1.138819  |           |
|              | H <sub>2</sub> O <sub>2</sub> +ED-71 | 0.2298798 | <0.001**  |
| Ctsk mRNA    | Control                              | 1         | <0.001*   |
|              | H <sub>2</sub> O <sub>2</sub>        | 1.352797  |           |
|              | H <sub>2</sub> O <sub>2</sub> +ED-71 | 1.077373  | <0.001**  |
| MMP9 protein | Control                              | 0.5059425 | <0.001*   |
|              | H <sub>2</sub> O <sub>2</sub>        | 0.7225320 |           |
|              | H <sub>2</sub> O <sub>2</sub> +ED-71 | 0.3871974 | <0.001**  |
| Ctsk protein | Control                              | 0.4866678 | <0.001*   |
|              | H <sub>2</sub> O <sub>2</sub>        | 0.9745414 |           |
|              | H <sub>2</sub> O <sub>2</sub> +ED-71 | 0.5326693 | <0.001**  |
| MMP9 mRNA    | NC                                   | 1         | <0.001#   |
|              | ED-71+NC                             | 0.2270765 |           |
|              | SiEphB4                              | 2.216938  | <0.00##   |
|              | ED-71 + SiEphB4                      | 0.9930749 | <0.001### |
| Ctsk mRNA    | NC                                   | 1         | <0.001#   |
|              | ED-71+NC                             | 0.2943938 |           |
|              | SiEphB4                              | 3.017875  | <0.00##   |
|              | ED-71 + SiEphB4                      | 1.1990945 | <0.001### |
| MMP9 protein | NC                                   | 0.5345529 | <0.001#   |
|              | ED-71+NC                             | 0.3196014 |           |
|              | SiEphB4                              | 0.9930331 | <0.00##   |
|              | ED-71 + SiEphB4                      | 0.6770321 | <0.001### |
| Ctsk protein | NC                                   | 0.5623052 | <0.001#   |
|              | ED-71+NC                             | 0.2666358 |           |
|              | SiEphB4                              | 0.6435410 | <0.00##   |
|              | ED-71 + SiEphB4                      | 0.6876856 | <0.001### |

\* Control vs. H<sub>2</sub>O<sub>2</sub>. \*\* H<sub>2</sub>O<sub>2</sub> vs. H<sub>2</sub>O<sub>2</sub>+ED-71

# NC vs. ED-71+NC. ## NC vs. SiEphB4. ### ED-71+NC vs. ED-71 + SiEphB4

## Supplementary data 5

Supplementary data Bootstrapping to Figure 6

|                                  | Group                                | Mean      | <i>P</i> |
|----------------------------------|--------------------------------------|-----------|----------|
| P-AKT protein                    | Control                              | 0.5864814 | <0.001*  |
|                                  | H <sub>2</sub> O <sub>2</sub>        | 0.2757692 |          |
|                                  | H <sub>2</sub> O <sub>2</sub> +ED-71 | 0.7421448 | <0.001** |
| P-PI3K protein                   | Control                              | 0.4287305 | <0.001*  |
|                                  | H <sub>2</sub> O <sub>2</sub>        | 0.1718247 |          |
|                                  | H <sub>2</sub> O <sub>2</sub> +ED-71 | 0.3180476 | <0.001** |
| P-AKT fluorescence<br>intensity  | Control                              | 1         | <0.001*  |
|                                  | H <sub>2</sub> O <sub>2</sub>        | 0.322442  |          |
|                                  | H <sub>2</sub> O <sub>2</sub> +ED-71 | 0.7748974 | <0.001** |
| P-PI3K fluorescence<br>intensity | Control                              | 1         | <0.001*  |
|                                  | H <sub>2</sub> O <sub>2</sub>        | 0.2437001 |          |
|                                  | H <sub>2</sub> O <sub>2</sub> +ED-71 | 1.0301669 | <0.001** |

\* Control vs. H<sub>2</sub>O<sub>2</sub>. \*\* H<sub>2</sub>O<sub>2</sub> vs. H<sub>2</sub>O<sub>2</sub>+ED-71

# Supplementary data 6

Supplementary data Bootstrapping to Figure 7

|                               | Group                                           | Mean      | <i>P</i>                          |
|-------------------------------|-------------------------------------------------|-----------|-----------------------------------|
| P-AKT fluorescence intensity  | NC                                              | 1         | <0.001 <sup>#</sup>               |
|                               | ED-71+NC                                        | 2.565105  |                                   |
|                               | SiEphB4                                         | 0.3721746 | <0.001 <sup>##</sup>              |
|                               | ED-71 + SiEphB4                                 | 0.3627714 | <0.001 <sup>###</sup>             |
| P-PI3K fluorescence intensity | NC                                              | 1         | <0.001 <sup>#</sup>               |
|                               | ED-71+NC                                        | 1.882617  |                                   |
|                               | SiEphB4                                         | 0.3729393 | <0.001 <sup>##</sup>              |
|                               | ED-71 + SiEphB4                                 | 0.3660938 | <0.001 <sup>###</sup>             |
| P-AKT protein                 | NC                                              | 0.5335103 | <0.001 <sup>#</sup>               |
|                               | ED-71+NC                                        | 0.7991396 |                                   |
|                               | SiEphB4                                         | 0.1700419 | <0.001 <sup>##</sup>              |
|                               | ED-71 + SiEphB4                                 | 0.2172040 | <0.001 <sup>###</sup>             |
| P-PI3K protein                | NC                                              | 0.5523302 | <0.001 <sup>#</sup>               |
|                               | ED-71+NC                                        | 0.8012697 |                                   |
|                               | SiEphB4                                         | 0.3112832 | <0.001 <sup>##</sup>              |
|                               | ED-71 + SiEphB4                                 | 0.2537139 | <0.001 <sup>###</sup>             |
| P-AKT protein                 | H <sub>2</sub> O <sub>2</sub>                   | 0.3430358 | <0.001 <sup>&amp;</sup>           |
|                               | H <sub>2</sub> O <sub>2</sub> + LY294002        | 0.1566890 |                                   |
|                               | H <sub>2</sub> O <sub>2</sub> + ED-71           | 0.5776687 | <0.001 <sup>&amp;&amp;</sup>      |
|                               | H <sub>2</sub> O <sub>2</sub> + ED-71+ LY294002 | 0.1959548 | <0.001 <sup>&amp;&amp;&amp;</sup> |
| P-PI3K protein                | H <sub>2</sub> O <sub>2</sub>                   | 0.3130758 | <0.001 <sup>&amp;</sup>           |
|                               | H <sub>2</sub> O <sub>2</sub> + LY294002        | 0.1856422 |                                   |
|                               | H <sub>2</sub> O <sub>2</sub> + ED-71           | 0.7096350 | <0.001 <sup>&amp;&amp;</sup>      |
|                               | H <sub>2</sub> O <sub>2</sub> + ED-71+ LY294002 | 0.3134323 | <0.001 <sup>&amp;&amp;&amp;</sup> |
| RANKL protein                 | H <sub>2</sub> O <sub>2</sub>                   | 0.3967519 | <0.001 <sup>&amp;</sup>           |
|                               | H <sub>2</sub> O <sub>2</sub> + LY294002        | 0.6286984 |                                   |
|                               | H <sub>2</sub> O <sub>2</sub> + ED-71           | 0.2075843 | <0.001 <sup>&amp;&amp;</sup>      |
|                               | H <sub>2</sub> O <sub>2</sub> + ED-71+ LY294002 | 0.6227701 | <0.001 <sup>&amp;&amp;&amp;</sup> |
| OPG protein                   | H <sub>2</sub> O <sub>2</sub>                   | 0.5427796 | <0.001 <sup>&amp;</sup>           |
|                               | H <sub>2</sub> O <sub>2</sub> + LY294002        | 0.1141555 |                                   |
|                               | H <sub>2</sub> O <sub>2</sub> + ED-71           | 0.8477257 | <0.001 <sup>&amp;&amp;</sup>      |
|                               | H <sub>2</sub> O <sub>2</sub> + ED-71+ LY294002 | 0.3330063 | <0.001 <sup>&amp;&amp;&amp;</sup> |
| P-AKT protein                 | H <sub>2</sub> O <sub>2</sub>                   | 0.6306323 | <0.001 <sup>^</sup>               |
|                               | H <sub>2</sub> O <sub>2</sub> + ARQ092          | 0.3526867 |                                   |
|                               | H <sub>2</sub> O <sub>2</sub> + ED-71           | 1.1937543 | <0.001 <sup>^^</sup>              |

|               |                                                  |           |                       |
|---------------|--------------------------------------------------|-----------|-----------------------|
|               | H <sub>2</sub> O <sub>2</sub> + ED-71+<br>ARQ092 | 0.5350711 | <0.001 <sup>^^^</sup> |
|               | H <sub>2</sub> O <sub>2</sub>                    | 0.2385276 | <0.001 <sup>^</sup>   |
|               | H <sub>2</sub> O <sub>2</sub> + ARQ092           | 0.4038239 |                       |
| RANKL protein | H <sub>2</sub> O <sub>2</sub> + ED-71            | 0.1090362 | <0.001 <sup>^^</sup>  |
|               | H <sub>2</sub> O <sub>2</sub> + ED-71+<br>ARQ092 | 0.4512656 | <0.001 <sup>^^^</sup> |
|               | H <sub>2</sub> O <sub>2</sub>                    | 0.4397608 | <0.001 <sup>^</sup>   |
|               | H <sub>2</sub> O <sub>2</sub> + ARQ092           | 0.2009165 |                       |
| OPG protein   | H <sub>2</sub> O <sub>2</sub> + ED-71            | 0.8377941 | <0.001 <sup>^^</sup>  |
|               | H <sub>2</sub> O <sub>2</sub> + ED-71+<br>ARQ092 | 0.3734085 | <0.001 <sup>^^^</sup> |

---

# NC vs. ED-71+NC.    ## NC vs. SiEphB4.    ### ED-71+NC vs. ED-71 + SiEphB4

& H<sub>2</sub>O<sub>2</sub> vs. H<sub>2</sub>O<sub>2</sub>+ LY294002.    && H<sub>2</sub>O<sub>2</sub> vs. H<sub>2</sub>O<sub>2</sub> + ED-71.

&&& H<sub>2</sub>O<sub>2</sub>+ LY294002 vs. H<sub>2</sub>O<sub>2</sub> + ED-71+ LY294002

<sup>^</sup> H<sub>2</sub>O<sub>2</sub> vs. H<sub>2</sub>O<sub>2</sub>+ ARQ092.    <sup>^^</sup> H<sub>2</sub>O<sub>2</sub> vs. H<sub>2</sub>O<sub>2</sub> + ED-71.

<sup>^^^</sup> H<sub>2</sub>O<sub>2</sub>+ ARQ092 vs. H<sub>2</sub>O<sub>2</sub> + ED-71+ ARQ092
